# Supplementary material for: Influence of rapidly oscillating inspired O2 and N2 concentrations on pulmonary vascular function and lung fluid balance in healthy adults
Source: PubMed Central journal article supplement (PMC9768664; doi:10.3389/fphys.2022.1018057), 2022-12-07
Supplement: Table1.pdf [file Table1.pdf]

## Supplementary Table 1. Rating scale to assess respiratory and cognitive symptoms

### **Respiratory Symptoms**

Chest Tightness

Desire to Cough

Other

0 - None

1 - Little

2 - Little/Moderate

3 - Moderate

4 - Moderate/Severe

5 - Severe

### **Cognitive Symptoms**

Lightheaded

Confusion

Vision Changes

Other
