# Supplementary material for: Influence of rapidly oscillating inspired O2 and N2 concentrations on pulmonary vascular function and lung fluid balance in healthy adults
Source: PubMed Central journal article supplement (PMC9768664; doi:10.3389/fphys.2022.1018057), 2022-12-07
Supplement: Table2.pdf [file Table2.pdf]

**Supplementary Table 2. The influence of 60s oscillations of 80/20 and 30/70 O<sub>2</sub>/N<sub>2</sub> concentrations on lung diffusion measures. SD: standard deviation. Bolded *p*-values denote a significant difference between that testing period and the pre exposure testing period ( $P < 0.05$ ).**

| Testing Period                                   | Mean   | SD    | <i>p</i> -value |
|--------------------------------------------------|--------|-------|-----------------|
| <b>Membrane Diffusion Capacity (mL/min/mmHg)</b> |        |       |                 |
| Pre                                              | 45.12  | 7.52  |                 |
| Mid                                              | 47.07  | 8.32  | 0.65            |
| Post                                             | 46.49  | 10.65 | 0.84            |
| Recovery                                         | 48.09  | 8.05  | 0.30            |
| <b>Pulmonary-Capillary Blood Volume (mL)</b>     |        |       |                 |
| Pre                                              | 110.85 | 22.23 |                 |
| Mid                                              | 101.30 | 18.50 | 0.11            |
| Post                                             | 100.20 | 17.68 | 0.06            |
| Recovery                                         | 104.08 | 21.17 | 0.36            |
| <b>Dm/Vc (l/min/mmHg)</b>                        |        |       |                 |
| Pre                                              | 0.43   | 0.09  |                 |
| Mid                                              | 0.48   | 0.08  | 0.28            |
| Post                                             | 0.48   | 0.07  | 0.45            |
| Recovery                                         | 0.48   | 0.07  | 0.27            |
| <b>Cardiac Output (mL/min)</b>                   |        |       |                 |
| Pre                                              | 5.39   | 1.08  |                 |
| Mid                                              | 5.09   | 1.07  | 0.69            |
| Post                                             | 5.45   | 1.29  | 0.99            |
| Recovery                                         | 5.29   | 1.32  | 0.98            |
